# Supplementary material for: Scalable production of core–shell nanoparticles by flash nanocomplexation to enhance mucosal transport for oral delivery of insulin
Source: Royal Society of Chemistry journal article supplement (doi:10.1039/c7nr08047f), 2018-01-01
Supplement: c7nr08047f1.pdf [file c7nr08047f1.pdf]

## ***Supplementary Information***

# **Scalable production of core-shell nanoparticles by flash nanocomplexation to enhance mucosal transport for oral delivery of insulin**

Zhiyu He,<sup>abcef</sup> Zhijia Liu,<sup>ab</sup> Houkuan Tian,<sup>ab</sup> Yizong Hu,<sup>fg</sup> Lixin Liu,<sup>a</sup>  
Kam W. Leong,<sup>\*abcd</sup>, Hai-Quan Mao,<sup>\*abefgh</sup> and Yongming Chen<sup>\*ab</sup>

<sup>a</sup>Center for Functional Biomaterials, <sup>b</sup>School of Materials Science and Engineering, Key Laboratory for Polymeric Composite and Functional Materials of Ministry of Education, Sun Yat-sen University, Guangzhou 510275, P. R. China.

<sup>c</sup>School of Medicine, Sun Yat-sen University, Guangzhou, 510080, P. R. China

<sup>d</sup>Department of Biomedical Engineering, Columbia University, New York, NY 10027, USA

<sup>e</sup>Department of Materials Science and Engineering, and <sup>f</sup>Institute for NanoBioTechnology, Johns Hopkins University, Baltimore, MD 21218, USA

<sup>g</sup>Department of Biomedical Engineering, and <sup>h</sup>Translational Tissue

Engineering Center, Johns Hopkins University School of Medicine,  
Baltimore, MD 21287, USA

\*To whom correspondence should be addressed:

Yongming Chen, School of Materials Science and Engineering, Sun  
Yat-sen University, No. 135, Xingang Xi Road, Guangzhou 510275, P.  
R. China; E-mail: [chenym35@mail.sysu.edu.cn](mailto:chenym35@mail.sysu.edu.cn)

Kam W. Leong, 351 Engineering Terrace, 1210 Amsterdam Avenue,  
Mail Code: 8904, New York, NY 10027, U. S. A.; E-mail:  
[kam.leong@columbia.edu](mailto:kam.leong@columbia.edu)

Hai-Quan Mao, 200B Shaffer Hall, 3400 N. Charles Street, Baltimore,  
MD 21218, U. S. A.; E-mail: [hmao@jhu.edu](mailto:hmao@jhu.edu)

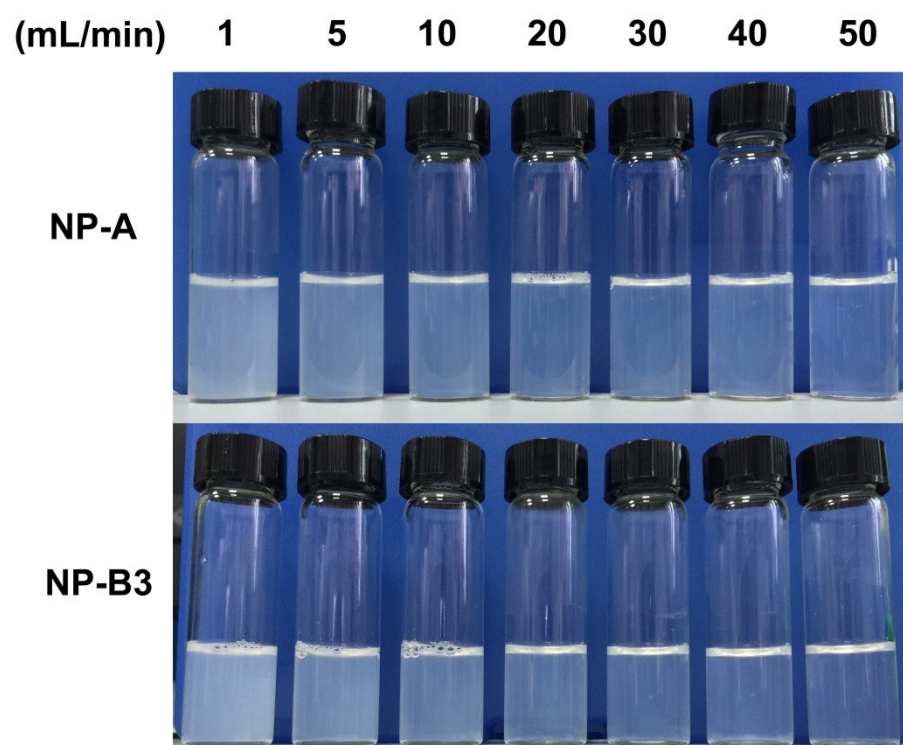

**Fig. S1.** The optical photos of samples (NP-A, NP-B3) fabricated under different flow rates (1 - 50 mL/min).

**Table S1.** Physicochemical properties of freshly prepared and reconstituted

NP-B3 nanoparticles upon lyophilization

| Parameter                | Freshly Prepared | Reconstituted  |
|--------------------------|------------------|----------------|
| Z-average diameter       | 104.5 ± 3.2 nm   | 102.4 ± 4.1 nm |
| Zeta potential           | -20.1 ± 0.5 mV   | -19.2 ± 0.7 mV |
| Polydispersity index     | 0.07 ± 0.01      | 0.08 ± 0.02    |
| Encapsulation efficiency | 97.1 ± 1.7%      | 95.8 ± 2.4%    |
| Loading content          | 66.6 ± 0.5%      | 66.3 ± 0.6%    |
| pH                       | 6.3              | 6.3            |
| Rehydration time         | ~                | ~10 sec        |

Note: Data are shown as means ± SD (n = 6). The cryoprotectant applied in lyophilization is 2% sorbitol (w/v).

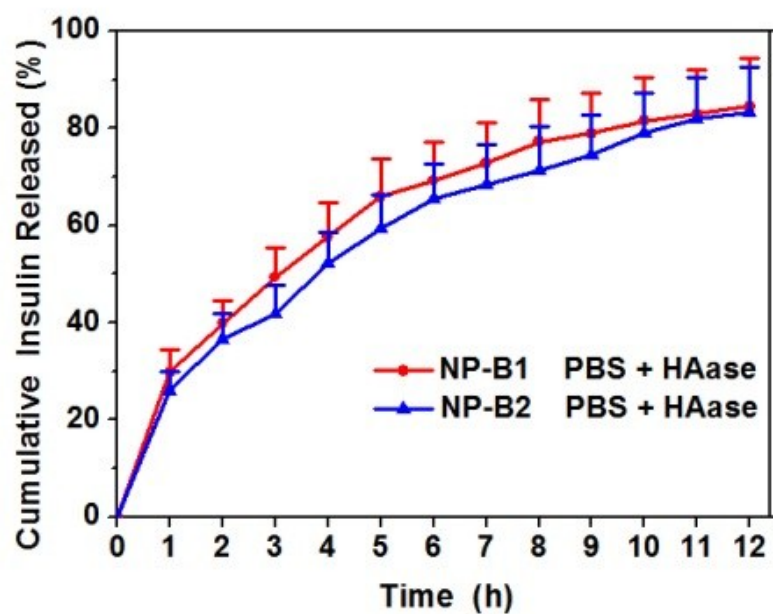

**Fig. S2.** *In vitro* release profiles of insulin from NP-B1 and NP-B2 in PBS (pH 7.4) with hyaluronidase (0.01 mg/mL). Data are shown as means  $\pm$  SD (n = 4).

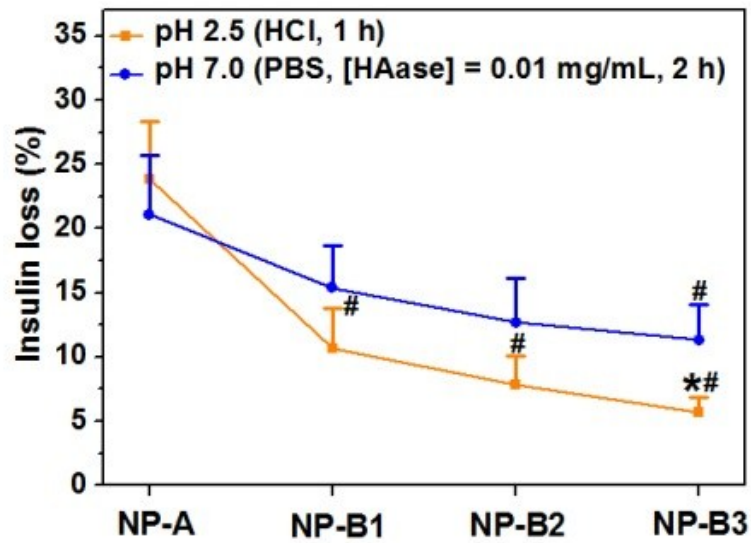

**Fig. S3.** Effect of medium pH on insulin loss from tested NPs *in vitro* at pH 2.5 and 7.0, simulating the pH environments in the fasting stomach and mucus layer, respectively. Data are shown as means  $\pm$  SD (n = 6).

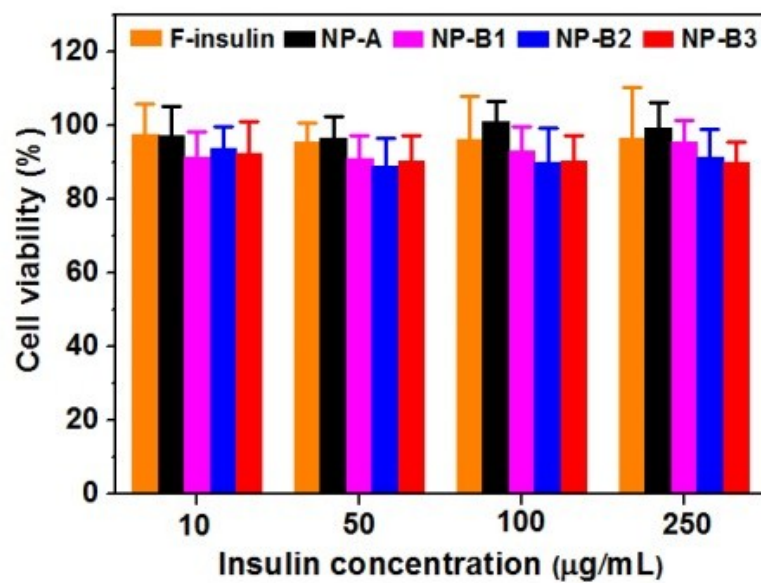

**Fig. S4.** Cytotoxicity of all tested NPs on HT29-MTX cells. Data are shown as means  $\pm$  SD ( $n = 6$ ).

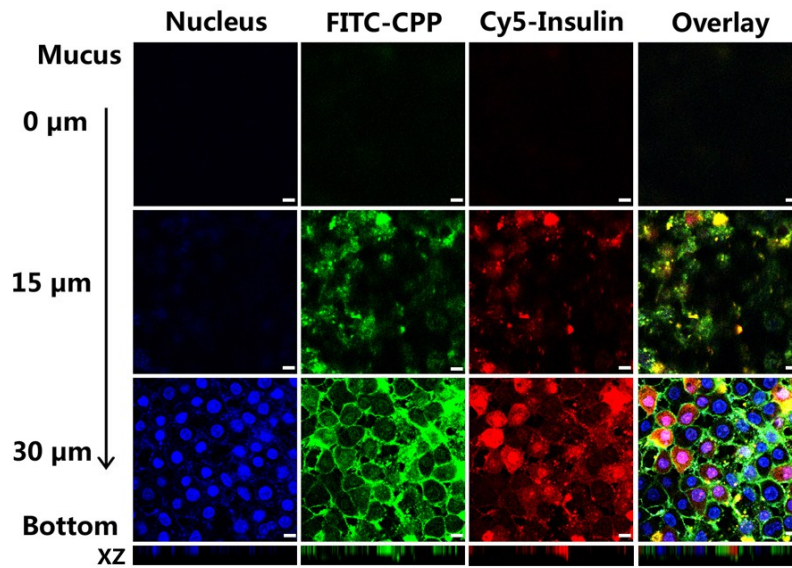

**Fig. S5.** Insulin transport across mucus layer covered on HT29-MTX cell monolayer visualized by confocal microscopy imaging. NP-B2 (HA coating: 35 kDa) was prepared from Cy5-labeled insulin and FITC-labeled CPP and incubated with HT29-MTX monolayer for 3 h before imaging. Cell nuclei were stained with DAPI (shown in blue). Scale bars: 10 μm.

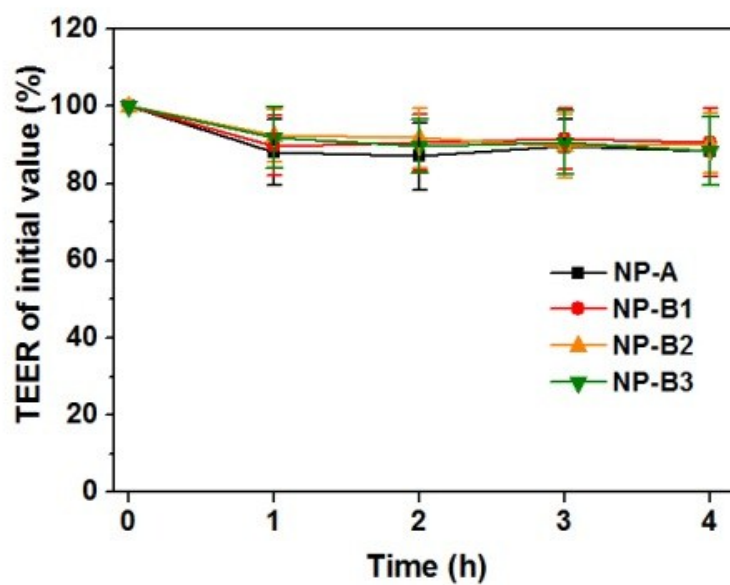

**Fig. S6.** Effect of tested NPs on TEER values of Caco-2 cell monolayer. The TEER value was presented as the percentage of the initial value before this test. Data are shown as means  $\pm$  SD (n = 6).

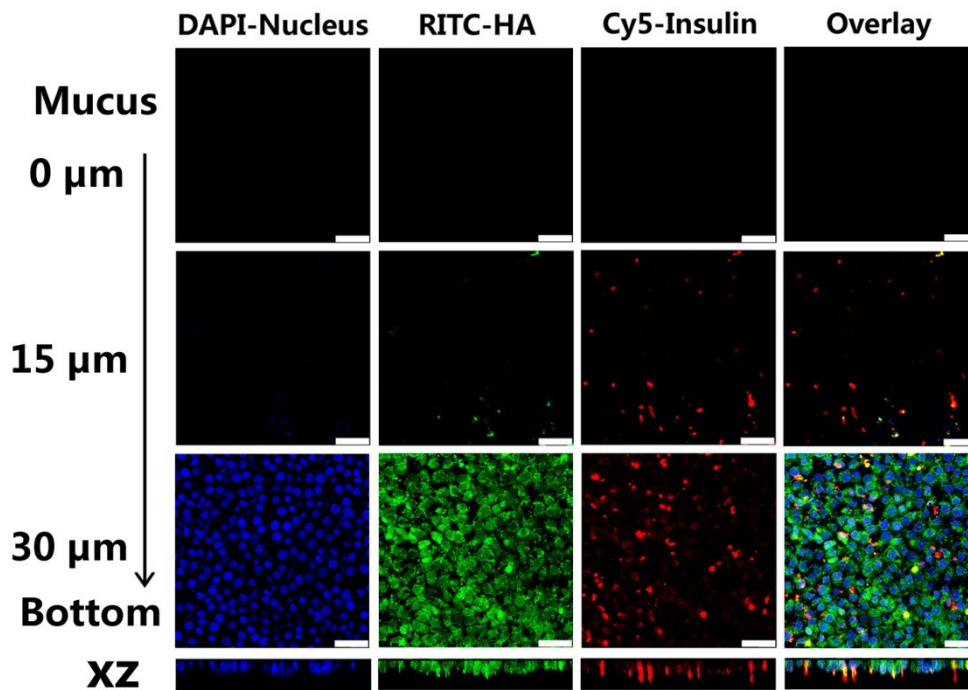

**Fig. S7.** CLSM images of the distribution of HA on mucus layer of HT29-MTX cell monolayer from apical to bottom side. NP-B2 (HA coating: 35 kDa) was prepared from Cy5-labeled insulin and RITC-labeled HA and incubated with HT29-MTX monolayer for 2 h before imaging. Blue: DAPI-cell nuclei; green: RITC-HA; red: Cy5-Insulin; yellow: co-localization of Cy5-insulin and RITC-HA. Scale bars: 50 μm. CLSM images on XZ axis represent the vertical distribution of HA and insulin on mucus layer of HT29-MTX cell monolayer.

**a**

**DAPI-Nucleus**

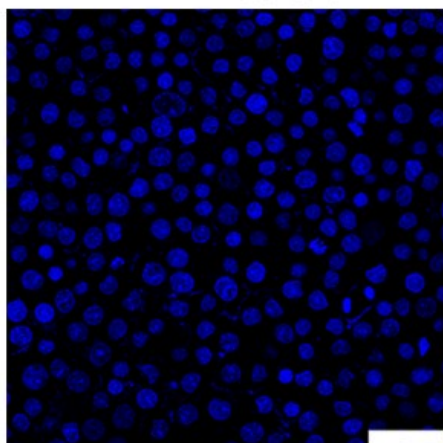

**RITC-HA**

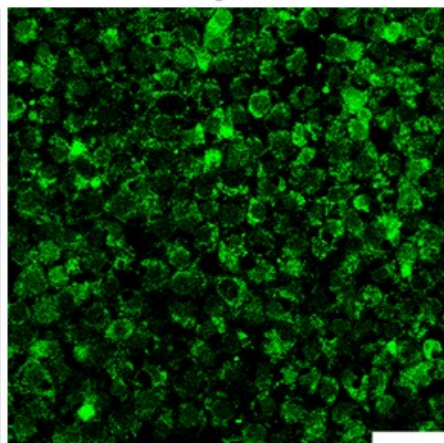

**Cy5-Insulin**

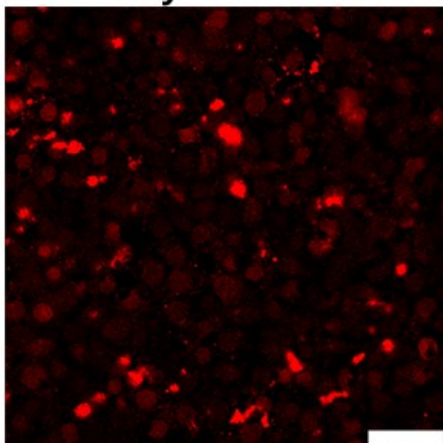

**Overlay**

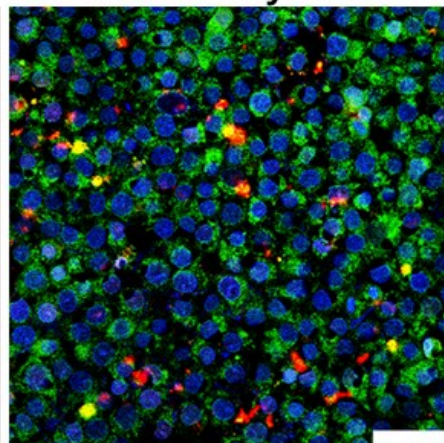

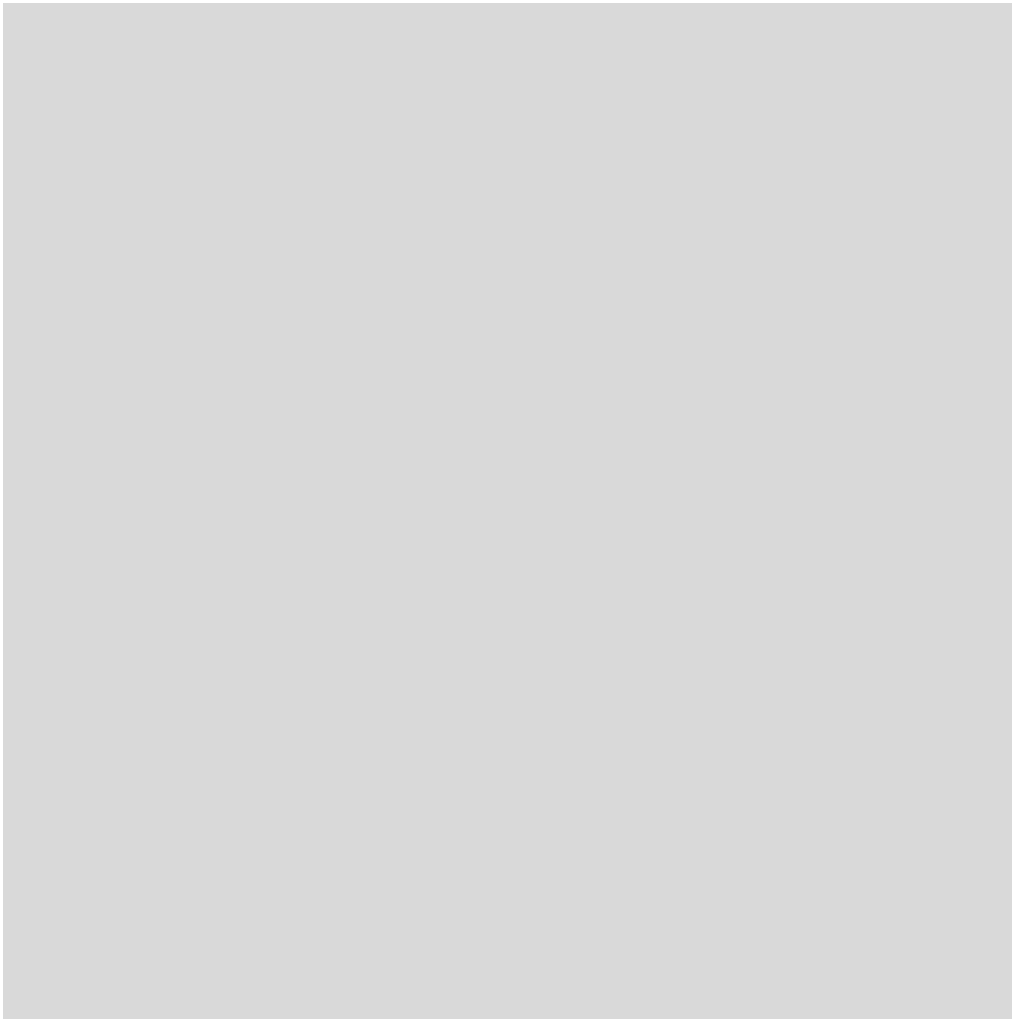

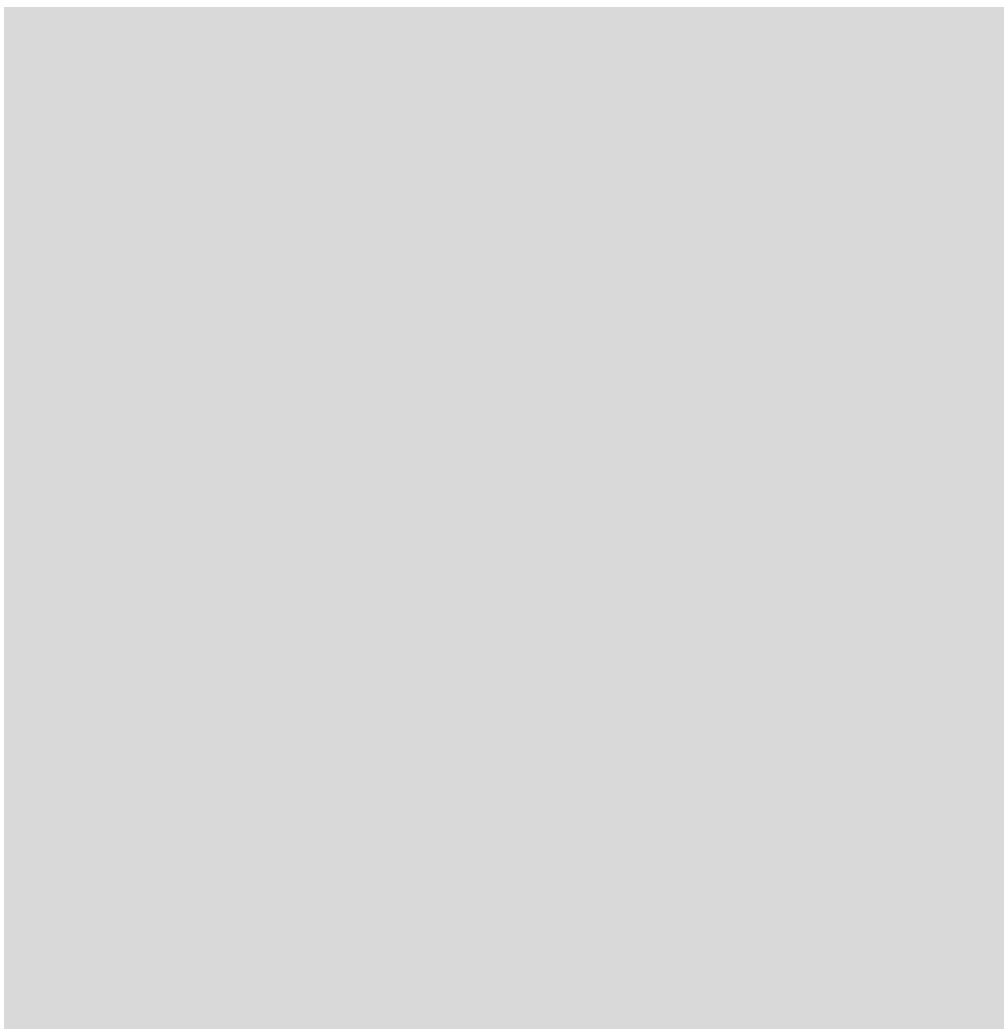

**Fig. S8.** The enlarged CLSM images showing the distribution of HA and insulin in NP-B nanoparticles through the mucus layer of HT29-MTX cell monolayer at depth of 30  $\mu\text{m}$ . Scale bars: 50  $\mu\text{m}$ . (a) NP-B1 nanoparticle (HA coating: 4.7 kDa); (b) NP-B2 nanoparticle (HA coating: 35 kDa); (c) NP-B3 nanoparticle (HA coating: 190 kDa).

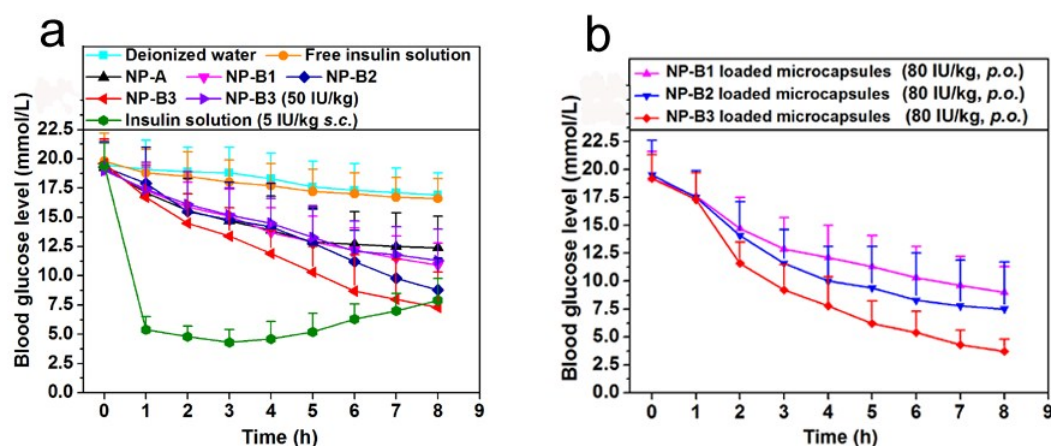

**Fig. S9.** Efficacy of insulin-loaded nanoparticles. (a) Variation of blood glucose levels of fasting diabetic rats following oral administration of deionized water (as a background control), free insulin (as a negative control) and different insulin formulations (all at insulin dose of 80 IU/kg, except an additional group of NP-B3 at 50 IU/kg as shown in the figure), or following *s.c.* injection free insulin solution at a dose of 5 IU/kg (as a positive control). Data are shown as means  $\pm$  SD (n = 8). (b) Variation of blood glucose levels of diabetic rats after orally administering MC-1/2/3 (i.e. HPMCP-coated NP-B1/2/3 nanoparticles) at an insulin dose of 80 IU/kg. Data are shown as means  $\pm$  SD (n = 6).

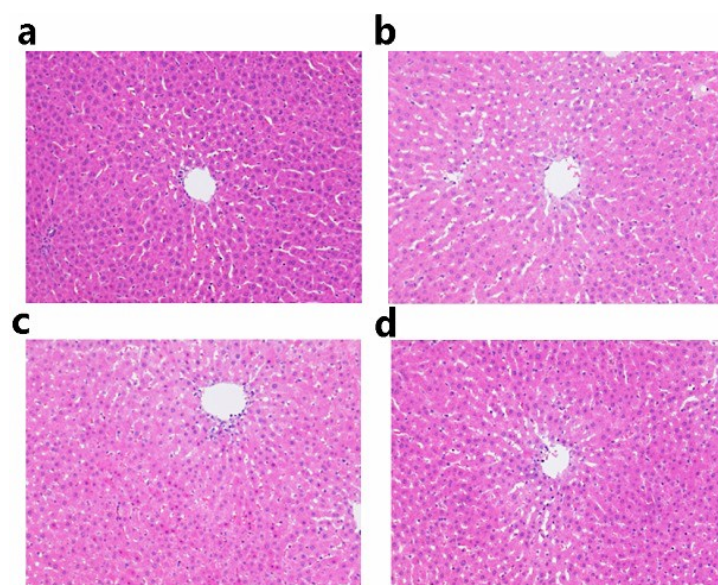

**Fig. S10.** Photomicrographs of the liver sections processed by hematoxylin-eosin (HE) staining. (a) Normal rats (non-diabetic) receiving PBS; (b) Diabetic rats receiving PBS; (c) Diabetic rats receiving NP-B3 nanoparticles; (d) Diabetic rats receiving MC3 suspension (loaded with NP-B3 nanoparticles).
